COMMENTS AND  
RESPONSES

**Maternal Glucose at 28 Weeks of Gestation Is not Associated With Obesity in 2-Year-Old Offspring: The Belfast Hyperglycemia and Adverse Pregnancy Outcome (HAPO) Family Study**

Comment on Pettit et al.

We read with great interest the article by Pettitt et al. (1). The authors examined the relation of glycemia during pregnancy with anthropometry in offspring of 1,165 nondiabetic pregnant women from the Belfast U.K. center of the multinational Hyperglycemia and Adverse Pregnancy Outcome (HAPO) Study. Overall, the correlations between maternal glucose during pregnancy and BMI Z score at age 2 years were weak and the only association that reached statistical significance was between categories of maternal 1-h glucose and BMI Z score  $\geq 85$ th percentile at age 2 years ( $P = 0.017$ ). These findings are in line with an earlier study by Knight et al. (2) in 2007 that showed that maternal fasting plasma glucose was significantly correlated with child birth weight, but that there was no correlation with weight from 12 weeks to 2 years of age. Similarly, Krishnaveni et al. (3) reported in 2005 that the increased body size observed at birth in offspring born to Indian mothers with gestational diabetes mellitus (GDM) diminished in the 1st postnatal year and reappeared in only female children by 2 years of age.

These findings are in some aspects comparable to a study performed by our group in Crete, Greece (4). The mother-child “Rhea” study in Crete is a prospective cohort examining pregnant women (Greek and immigrant) residents at the prefecture of Heraklion that became pregnant during 1 year starting in February 2007 and initiated prenatal care before 15 weeks of gestation. Six hundred and thirty-five pregnant women and their children, were included in this analysis. Pregnant women were screened for GDM between 24 and 28 weeks of gestation, and GDM was defined by the criteria proposed by Carpenter and Coustan. Weight, height, abdominal circumference, and skinfold thickness (triceps, quadriceps, subscapular, and suprailiac) were measured at 18 months of age (59 offspring of mothers with gestational diabetes). Multivariable linear and logistic regression models were used to estimate the effect of GDM on the risk of adiposity in early childhood after adjusting for offspring sex, age, maternal education, and parity. Offspring of mothers with GDM did not differ significantly in BMI ( $\beta$  coefficient  $-0.20$  [95% CI  $-0.83$  to  $0.44$ ]), abdominal circumference ( $\beta$  coefficient  $0.30$  [95% CI  $-0.65$  to  $1.25$ ]), or body fat percentage ( $\beta$  coefficient  $-0.27$  [95% CI  $-1.59$  to  $1.05$ ]) compared with offspring of nondiabetic mothers after adjustment for offspring sex, age, maternal education, and parity. Similarly, adiposity rates (BMI  $\geq 85$ th percentile; abdominal circumference  $\geq 85$ th percentile; sum of skin folds  $> 85$ th percentile; and percent body fat  $> 85$ th percentile) did not differ significantly between the two groups.

Therefore, it is probable that the impact of maternal glycemia during pregnancy on offspring growth is transient because it is not detectable at the first 2 years of age, even though in the long-term the associations between GDM and childhood obesity recur in older ages.

LEDA CHATZI, MD, PHD<sup>1</sup>  
ELENI PAPADOPOULOU, MPH<sup>1</sup>  
MARINA VAFIADI, MPH<sup>1</sup>

ANGELOS PAPPAS, MD<sup>2</sup>  
MANOLIS KOGEVINAS, MD, PHD<sup>3,4,5</sup>

From the <sup>1</sup>Department of Social Medicine, Faculty of Medicine, University of Crete, Heraklion, Greece; the <sup>2</sup>Diabetic Clinic, Venizelio Hospital, Heraklion, Greece; the <sup>3</sup>Centre for Research in Environmental Epidemiology (CREAL), Barcelona, Spain; the <sup>4</sup>Municipal Institute of Medical Research (IMIM), Barcelona, Spain; and the <sup>5</sup>National School of Public Health, Athens, Greece.

Corresponding author: Leda Chatzi, lchatzi@med.uoc.gr.

DOI: 10.2337/dc10-1821

© 2011 by the American Diabetes Association. Readers may use this article as long as the work is properly cited, the use is educational and not for profit, and the work is not altered. See <http://creativecommons.org/licenses/by-nc-nd/3.0/> for details.

**Acknowledgments**—No potential conflicts of interest relevant to this article were reported.

Parts of this study were presented in abstract form at the 46th European Association for the Study of Diabetes Annual Meeting, Stockholm, Sweden, 20–24 September 2010.

References

- Pettitt DJ, McKenna S, McLaughlin C, Patterson CC, Hadden DR, McCance DR. Maternal glucose at 28 weeks of gestation is not associated with obesity in 2-year-old offspring: the Belfast Hyperglycemia and Adverse Pregnancy Outcome (HAPO) family study. *Diabetes Care* 2010;33:1219–1223
- Knight B, Shields BM, Hill A, Powell RJ, Wright D, Hattersley AT. The impact of maternal glycemia and obesity on early postnatal growth in a nondiabetic Caucasian population. *Diabetes Care* 2007;30:777–783
- Krishnaveni GV, Hill JC, Leary SD, Veena SR, Saperia J, Saroja A, Karat SC, Fall CH. Anthropometry, glucose tolerance, and insulin concentrations in Indian children: relationships to maternal glucose and insulin concentrations during pregnancy. *Diabetes Care* 2005;28:2919–2925
- Chatzi L, Plana E, Daraki V, Karakosta P, Alegkakis D, Tsatsanis C, Kafatos A, Koutis A, Kogevas M. Metabolic syndrome in early pregnancy and risk of preterm birth. *Am J Epidemiol* 2009;170:829–836
